# Supplementary material for: Fn-Dps, a novel virulence factor of Fusobacterium nucleatum, disrupts erythrocytes and promotes metastasis in colorectal cancer
Source: PLOS journal article supplement (doi:10.1371/journal.ppat.1011096), 2023-01-24
Supplement: S10 (10.1371/journal.ppat.1011096.s010) [file journal.ppat.1011096.s010]

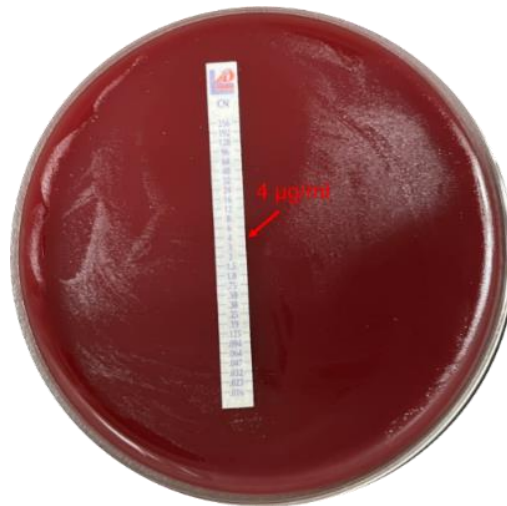

**S10 Fig.** Gentamycin susceptibility testing for Fn by E-test.
